# Supplementary material for: Growth differentiation factor 15 is a myomitokine governing systemic energy homeostasis
Source: PubMed Central journal article supplement — J Cell Biol. 2017 Jan 2;216(1):149–65. doi: 10.1083/jcb.201607110 (PMC5223607; doi:10.1083/jcb.201607110), 2017-01-02
Supplement: JCB_201607110_sm.pdf [file JCB_201607110_sm.pdf]

Chung et al., <https://doi.org/10.1083/jcb.201607110>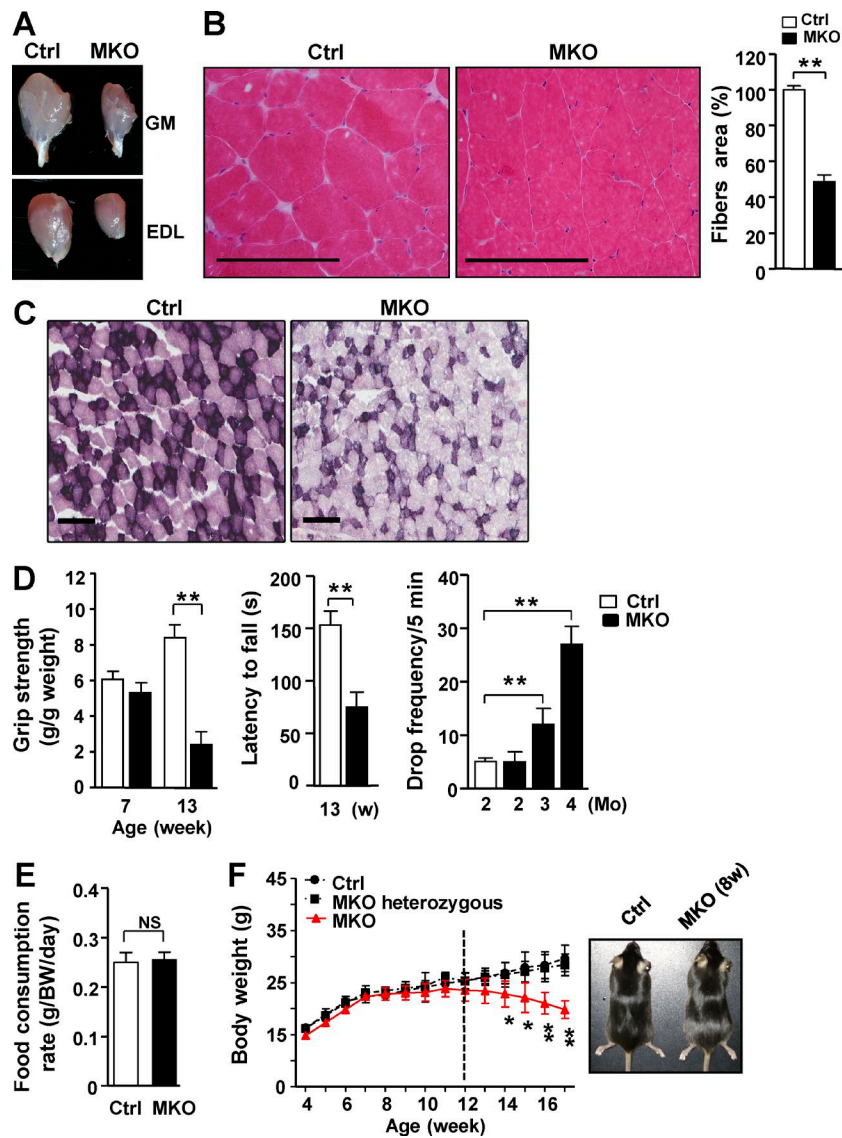

Figure S1. **Muscle phenotypes and metabolic parameters of MKO mice fed a chow diet.** (A) Gross image of gastrocnemius muscle (GM; top) and extensor digitorum longus (EDL) muscle (bottom) from chow-fed 15-wk-old male Ctrl and MKO mice. (B) Hematoxylin and eosin staining of GM (left) and quantitation of GM fiber cross-sectional area in 15-wk-old Ctrl and MKO mice fed a chow diet. Bars, 100  $\mu$ m. (C) Succinate dehydrogenase staining in EDL muscle in 15-wk-old male Ctrl and MKO mice. Bars, 100  $\mu$ m. (D) Grip strength (13 wk,  $n = 10$ ), latency to fall (13 wk,  $n = 10$ ), and drop frequency of 2- to 4-mo-old male Ctrl and MKO mice ( $n = 10$  per group). (E) Daily food intake on chow diet was measured in 8-wk-old male Ctrl and MKO mice. Mice were housed individually, and food weight was measured three times per week ( $n = 10$  per group). (F) Body weight of male Ctrl, MKO heterozygous, and MKO mice on standard chow diet (left,  $n = 10$  per group). Representative images of 8-wk-old mice (right). All data represent mean  $\pm$  SEM; \*,  $P < 0.05$ ; \*\*,  $P < 0.01$ . N.S., not significant.

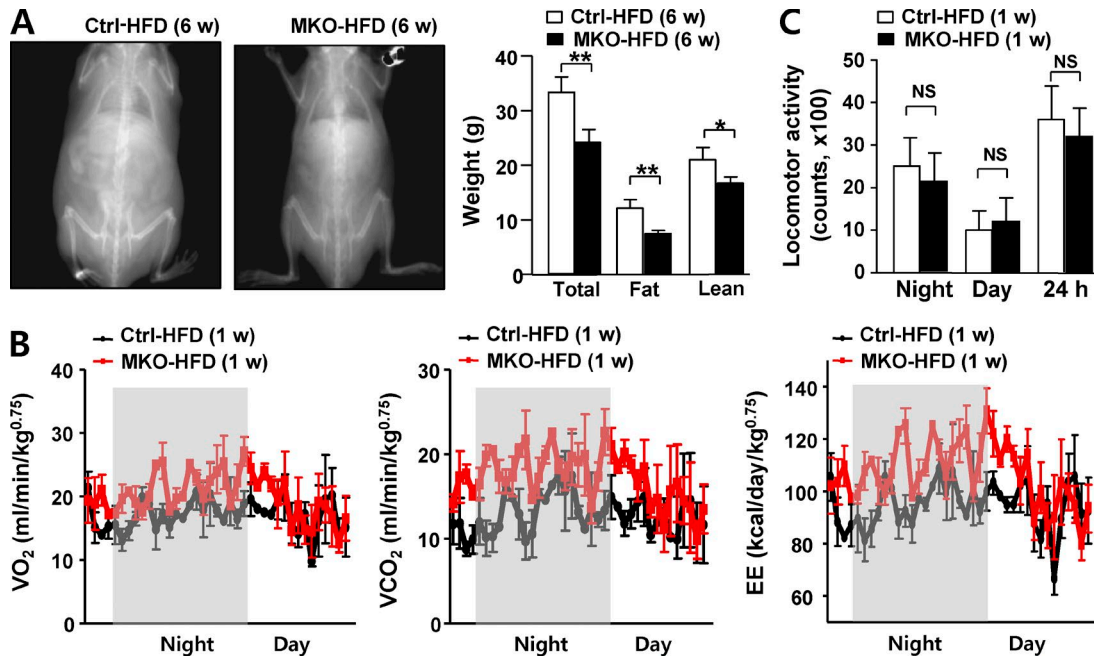

Figure S2. **Reduced muscle and fat mass and elevated EE in HFD-fed MKO mice.** (A) Representative dual-energy x-ray absorptiometry images (left) and body composition of HFD-fed 11-wk-old male Ctrl and MKO mice ( $n = 10$  per group). 5-wk-old male mice were fed an HFD for 6 wk. (B) Oxygen consumption ( $VO_2$ ), carbon dioxide generation ( $VCO_2$ ), energy expenditure (EE), and locomotor activity (C) of 8-wk-old male Ctrl and MKO mice on 1 wk (short-term) HFD. Mice were analyzed by indirect calorimetry over a period of 12 h light/12 h dark cycles ( $n = 5$  per group). Data represent mean  $\pm$  SEM. \*,  $P < 0.05$ ; \*\*,  $P < 0.01$ . NS, not significant.

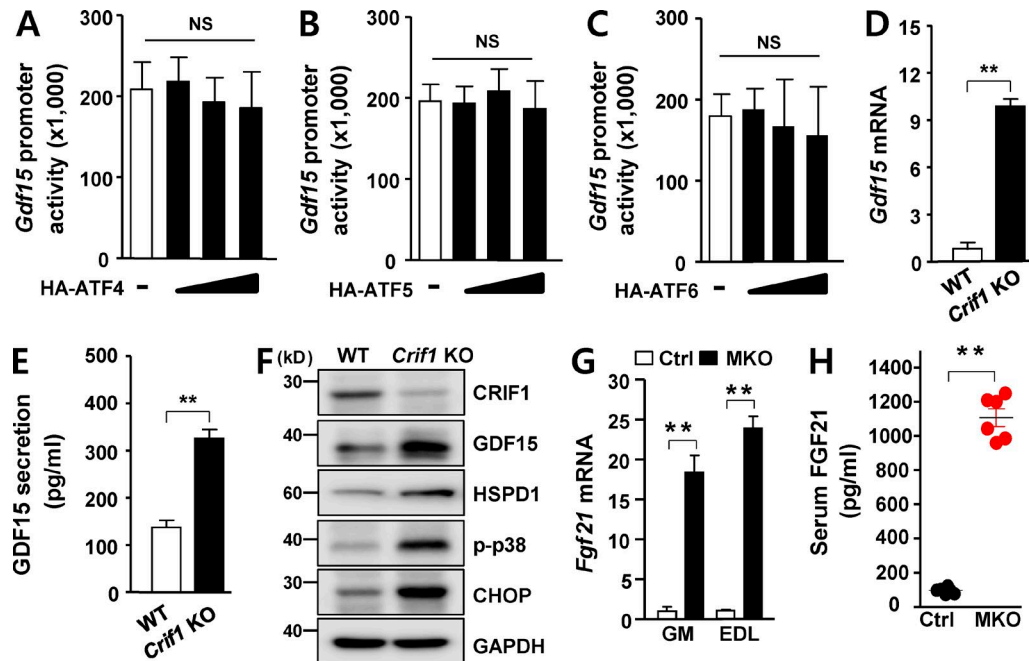

Figure S3. **ATF4/5/6-independent *GDF15* promoter activity and CHOP-dependent induction of *GDF15* in *Crif1*-deficient MEF cells.** (A–C) Promoter activity of *GDF15* in C2C12 myoblasts transiently cotransfected with a luciferase reporter driven by the human *GDF15* promoter (–1.7 kb) and mock control or expression vector for HA-tagged human ATF4 (A), human ATF5 (B), or human ATF6 (C). *Gdf15* mRNA expression (D) and *GDF15* secretion (E) in *Crif1*-knockout (KO) MEF cells. (F) Immunoblotting to detect CRIF1, *GDF15*, HSPD1, CHOP, and phospho-p38 T180/Y182 expression in *Crif1*-deficient MEF cells. All data represent mean  $\pm$  SEM. \*\*,  $P < 0.01$ . NS, not significant. (G) *Fgf21* mRNA expression in GM and EDL muscle in 8-wk-old male Ctrl and MKO mice fed a chow diet ( $n = 10$  per group). (H) Serum FGF21 concentration in chow-fed 8-wk-old male Ctrl and MKO mice in the fasting state ( $n = 5$ –6 per group). All data represent mean  $\pm$  SEM. \*,  $P < 0.05$ ; \*\*,  $P < 0.01$ .

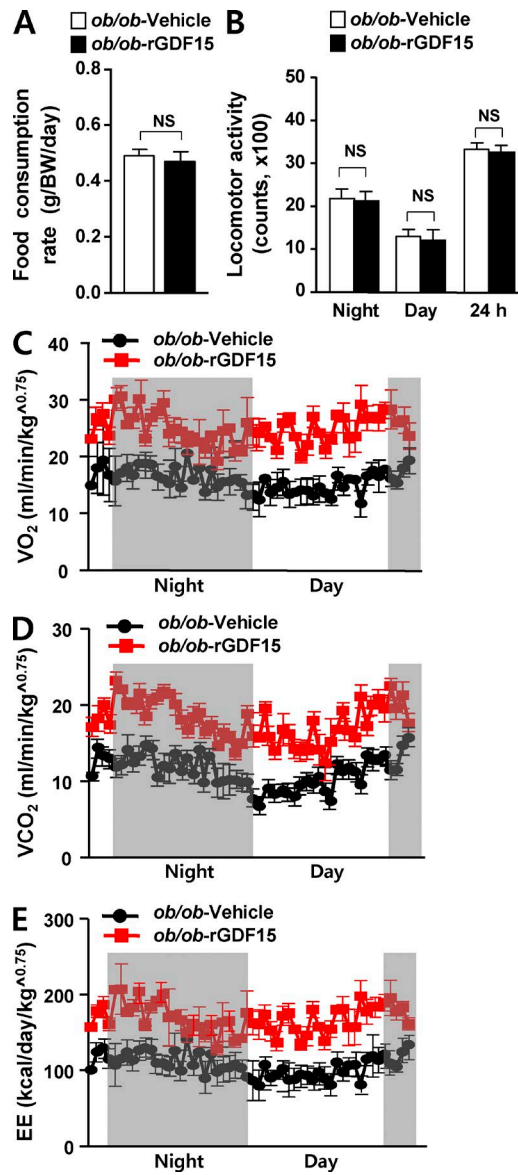

Figure S4. **rGDF15-treated *ob/ob* mice exhibit elevated EE.** Food intake (A), locomotor activity (B), oxygen consumption ( $VO_2$ ; C), carbon dioxide generation ( $VCO_2$ ; D), and energy expenditure (EE; E) of *ob/ob*-vehicle and *ob/ob*-rGDF15 mice. Male *ob/ob* mice were injected intraperitoneally three times per week for 3 wk with 0.5 mg/kg rGDF15 or vehicle. Mice were analyzed by indirect calorimetry over a period of 12 h light/12 h dark cycles ( $n = 5$  per group). All data represent means  $\pm$  SEM. NS, not significant.

Table S1. List of primer sets used for quantitative RT-PCR analyses

| Gene                | Forward (5'-3')       | Reverse (5'-3')         |
|---------------------|-----------------------|-------------------------|
| <i>Clpp</i>         | GCCATTCACCTGCCAATTC   | TGCTGACTCGATCACCTGTAG   |
| <i>Hspd1</i>        | GAGCTGGGTCCCTCACTCG   | AGTCGAAGCATTCTGCGGG     |
| <i>Lonp1</i>        | AGCCCTATGTTGGGCTCTTC  | CCGGCTGATGTGAATCCTTCT   |
| <i>Tid1</i>         | GGAAGCAAGGATAGGCGAGA  | GTTGACCGCTTCTCAGCAG     |
| <i>Htra2</i>        | TCCCCGGAGCCAGTACAAT   | GAAAGGGTGCCGGTCTAGG     |
| <i>Chop</i>         | AACAGAGGTCAACAGCACAT  | ACTTTCCGCTCGTTCTCCTG    |
| <i>Aif4</i>         | GGGTCTGTCTTCCACTCCA   | AAGCAGCAGAGTCAGGCTTTC   |
| <i>Grp78</i>        | GTGTGTGAGACCAGAACCCT  | AGTCAGGCAGGAGTCTTAGG    |
| <i>Ppara</i>        | CTCCCTCCTTACCCTTGGAG  | GCCTCTGATCACCACCATT     |
| <i>Acadv1</i>       | TTACATGCTGAGTGCCAACAT | CGCCTCCGAGCAAAAGATT     |
| <i>Acadvm</i>       | TGACGGAGCAGCCAATGA    | TCGTACCCTTCTTCTGCTT     |
| <i>Hsl</i>          | AGACACCAGCCAACGGATAC  | GCGGTAGAAAGCCACATAGC    |
| <i>Fasn</i>         | TACGTAAGTGGCTACACCCAA | TGAACTGCTGCACGAAGAAGCAT |
| <i>Pparg</i>        | ATCTTAACTGCCGGATCCAC  | TGGTGATTTGTCGGTTGTCT    |
| <i>Pgc1a</i>        | TCACACCAAAACCACAGAAA  | CTTGGGGTCATTTGGTGACT    |
| <i>Cpt1a</i>        | TATAACAGGTGGTTTGAC    | CAGAGGTGCCAATGATG       |
| <i>Cpt1b</i>        | TCGCAGGAGAAAACCCATG   | AACAGTGCTTGGCGGATGTG    |
| <i>Cox1</i>         | ATTCGAGCAGAATTAGGTCA  | CTCCGATTATTAGTGGGACA    |
| <i>Ndufa9</i>       | ACTGTGTTTGGGGCTACAGG  | GATTGATGACCACGTTGCTG    |
| <i>Dio2</i>         | AGAGTGGAGGCGCATGCT    | GGCATCTAGGAGGAAGCTGTTT  |
| <i>Ucp1</i>         | AGGGCCCCCTTCATGAGGTC  | GTGAAGGTGAGAAATGCAAGC   |
| <i>Xbp1</i>         | CAGCACTCAGACTATGTGCA  | GTCCATGGGAAGATGTTCTGG   |
| <i>Xbp1 spliced</i> | CTGAGTCCGAATCAGGTGCAG | GTCCATGGGAAGATGTTCTGG   |
| <i>Gdf15</i>        | GAGCTACGGGTGCGCTTC    | GGGACCCCAATCTCACCT      |
| <i>Fgf21</i>        | AGATCAGGGAGGATGGAACA  | TCAAAGTGAGGCGATCCATA    |
| <i>Cidea</i>        | ATCACAACTGGCCTGGTTACG | TACTACCCGGTGTCCATTTCT   |
| <i>Atgl</i>         | CCACCAACATCCACGAGCTT  | TTCGAGAGGCGGTAGAGATTG   |
| <i>18S</i>          | CTGGTTGATCCTGCCAGTAG  | CGACCAAAAGGAACCATAACT   |
| <i>Gapdh</i>        | GACATGCCCGCTGGAGAAAC  | AGCCCAGGATGCCCTTTAGT    |
